# Supplementary material
Source: PubMed Central journal article supplement (PMC11655129)
Supplement: NIHMS2039702-supplement-Supplementary_Info.pdf [file NIHMS2039702-supplement-Supplementary_Info.pdf]

**Supplementary information**

---

**Systematic molecular evolution enables  
robust biomolecule discovery**

---

In the format provided by the  
authors and unedited

## Supplementary Information

### Supplementary Table 1 | Method details for each experiment.

In all cases, the flow-through rate was 1 vol/hr. MP6<sup>24</sup> was used as the mutagenesis plasmid in all evolution experiments. See the Supplementary Table 4 for plasmid maps.

| Experiment                              | Figure                                        | Bacterial source | Replicate Layout                                                                                   | AP/Phage                                                                                                                                                                 |
|-----------------------------------------|-----------------------------------------------|------------------|----------------------------------------------------------------------------------------------------|--------------------------------------------------------------------------------------------------------------------------------------------------------------------------|
| Phage propagation with 96-head          | SI Fig 7 (left)                               | Turbidostat      | 96 replicates in a dense 96-well plate. All wells inoculated with phage.                           | AP: pJC173b*. Phage: WT T7 RNAP selection phage                                                                                                                          |
| Phage propagation with 96-head          | SI Fig 7 (right)                              | Turbidostat      | 96 replicates, every-other-column layout, spread over two plates. All wells inoculated with phage. | AP: pJC173b. Phage: WT T7 RNAP selection phage                                                                                                                           |
| Phage propagation with 96-head          | Figure 1d (left), SI Fig 2a, SI Fig 7 (right) | Turbidostat      | 96 replicates, every-other-column, spread over two plates. Checker board inoculation pattern.      | AP: pJC173b. Phage: WT T7 RNAP selection phage                                                                                                                           |
| Phage propagation with 8-channel head   | SI Fig 8b                                     | Turbidostat      | 96 replicates, every-other-column, spread over two plates. Checker board inoculation pattern.      | AP: pJC173b. Phage: WT T7 RNAP selection phage                                                                                                                           |
| Phage propagation with chilled bacteria | Fig 1d (right)                                | Chilled bacteria | 16 replicates, every-other-column layout.                                                          | AP: pJC173b. Phage: WT T7 RNAP selection phage                                                                                                                           |
| T7 → T3 RNAP evolution                  | Figure 2b, SI Fig 5b-d                        | Turbidostat      | 96 replicates, every-other-column layout, spread over two plates.                                  | AP: pJC174b*. Phage: WT T7 RNAP selection phage                                                                                                                          |
| AARS evolution                          | Figure 3, SI Fig 2b                           | Turbidostat      | 24 replicates, every-other-column layout.                                                          | AP: pEC182a<br>Phage: ECSP1x11, ECSP1x13 **                                                                                                                              |
| AGGG qtRNA evolution                    | Figure 4a-d, SI Fig 6e                        | Turbidostat      | 48 replicates, every-other-column layout.                                                          | AP: pED15x7, Phage: all 20 ESP1x phage libraries and !AGGG phage variants                                                                                                |
| TAGA qtRNA evolution                    | SI Fig 6                                      | Turbidostat      | 48 replicates, every-other-column layout.                                                          | AP: pED15x1, Phage: all 20 ESP1x phage, and phage libraries                                                                                                              |
| Feedback control qtRNA evolution        | Figure 4e-i, Figure 5                         | Chemostats       | 48 replicates, every-other-column layout.                                                          | Lenient AP: pED7x163 + pED20x5.<br>Moderate AP: pED15x1 + ES rope.<br>Stringent AP: pED15x2 + ES rope. Phage: ESP1xR-1, ESP1xS-1, ESP1xH-1, ESP1xF-1.                    |
| 10-day T7 evolution                     | Figure 6                                      | Chilled Bacteria | 32 replicates, every-other-column layout, 2 volumes per hour                                       | pJC173b (T7), pJC174b (T3), pJC175e (psp-pIII), pEC201 (T3/TP6), pEC202 (T7/SP6), pEC203 (SP6), pEC204 (SP6/TP6), pEC205 (TP6), pEC206 (-3 variant), pEC207 (-5 variant) |

\* pJC173b, pJC174b, and WT T7 RNAP selection phage were gifts from Ahmed Badran.

\*\* chPylRS AP and phage derived from pDB038a and pTECH-chPylRS. pTECH-chPylRS(IPYE) was a gift from Dieter Söll (Addgene plasmid # 99222 ; <http://n2t.net/addgene:99222> ; RRID:Addgene\_99222). pDB038a was a gift from David Liu (Addgene plasmid # 99211 ; <http://n2t.net/addgene:99211> ; RRID:Addgene\_99211).

**Supplementary Table 2 | Complete T7 RNAP clonal sequencing and conservation.** Time required for evolution designated by early (t = 21h), mid (t = 23.5h), late (t = 26h). 4 replicates sampled for each time window, 3 clonal variants sequenced per replicate by sanger sequencing.

| Evolution Timepoint | Well  | Mutations                     |
|---------------------|-------|-------------------------------|
| Early               | H8    | M219R,E477G,V521A             |
|                     | F10   | M219R,A373S,N748D             |
|                     | F11   | M219R,A373S,N748D             |
|                     | F12   | M219R,A323T                   |
|                     | C8    | E222K,N748D                   |
|                     | C9    | A382S,E694G,N748D             |
|                     | C10   | E222K,N748D                   |
|                     | F1    | H205R,E683G,N748D,E775K       |
|                     | F2    | V177I,H205R,A323V,N748D,E775K |
|                     | F3    | M219R,N748D                   |
| Mid                 | D9    | M219R,K329R,V625I,N748D       |
|                     | D10   | M219R,A260V,Y385C,D388G,N748D |
|                     | C1    | M219R,A304V,N748S             |
|                     | C2    | M219R,A304V,N748S             |
|                     | C3    | M219R                         |
|                     | E2    | M219R                         |
|                     | E3    | A144T,E222K                   |
|                     | B6    | Y312H,N748D                   |
|                     | B7    | K098R                         |
|                     | B8    | K098R,V214L                   |
| Late                | A11   | E207K,N748D                   |
|                     | A12   | E207K,N748D                   |
|                     | D5    | E222G,N748D                   |
|                     | D6    | M219R,D388N                   |
|                     | D7    | M219R,T282A,D388N             |
|                     | C12   | M219R,I718T,N748S             |
|                     | D1    | M219R                         |
|                     | D2    | M219R                         |
|                     | C5    | M219R,N748S                   |
|                     | C6    | M219R                         |
| C7                  | M219R |                               |

**Supplementary Table 3 | Long Term PRANCE Evolution subclone genotypes.**

Genotypes of all subclones obtained from the 10-day T7 PRANCE on TP6, -3 Variant and -5 variant promoters. Bolded subclones for each replicate were chosen for luminescence assay validation.

| Trajectory | Condition                     | AP                                                                                                                         | Rep | Subclone | Mutation                                                                         |   |   |                                     |
|------------|-------------------------------|----------------------------------------------------------------------------------------------------------------------------|-----|----------|----------------------------------------------------------------------------------|---|---|-------------------------------------|
| SP6        | 12h                           | TP6                                                                                                                        | 1   | 1        | R31S R57H D66E V177G M219R A253V D471G S633P M696L A724S R756C                   |   |   |                                     |
|            |                               |                                                                                                                            |     | 2        | R31S R57H D66E V177G M219R A253V D471G E504W S633P M696L A724S R756C             |   |   |                                     |
|            |                               |                                                                                                                            |     | 3        | M219R N370S A519T L532F N748D                                                    |   |   |                                     |
|            |                               |                                                                                                                            |     | <b>4</b> | <b>R31S R57H D66E E108K V177G M219R A253V S633P</b>                              |   |   |                                     |
|            |                               |                                                                                                                            |     | 5        | R31S D66E V177G M219R A253V V574A S633P A724S                                    |   |   |                                     |
|            |                               |                                                                                                                            | 2   | 1        | F51S M219R E683G A691D N748D                                                     |   |   |                                     |
|            |                               |                                                                                                                            |     | 2        | F51S S139G M219R F511V E683G A691D N748D                                         |   |   |                                     |
|            |                               |                                                                                                                            |     | 3        | E56G R96L K98R K172Q M219K T282A V340I E504W S527I S606A S641A L706M A822E T831A |   |   |                                     |
|            |                               |                                                                                                                            |     | 4        | F51S R99G M219R E683G A691D N748D                                                |   |   |                                     |
|            |                               |                                                                                                                            |     | <b>5</b> | <b>F51S M219R E683G A691D N748D</b>                                              |   |   |                                     |
|            |                               |                                                                                                                            |     | 6        | T3P E40G F51S E63G A65G T75P M81K R84P R99G S139R A691D N748D                    |   |   |                                     |
|            |                               |                                                                                                                            |     | 7        | F51S A144T K179Q M219R E683G A691D N748D M750I A808E S813Y L870K F880L A881P     |   |   |                                     |
|            |                               |                                                                                                                            | 3   | 1        | A7T M219R C540G A724V                                                            |   |   |                                     |
|            |                               |                                                                                                                            |     | 2        | M219R R357C Q648K W682R N748S                                                    |   |   |                                     |
|            |                               |                                                                                                                            |     | 3        | M219R R357C Q648K W682R                                                          |   |   |                                     |
|            |                               |                                                                                                                            |     | 4        | C540G                                                                            |   |   |                                     |
|            |                               |                                                                                                                            |     | <b>5</b> | <b>M219R C540G</b>                                                               |   |   |                                     |
|            |                               |                                                                                                                            |     | 6        | T76I C540G                                                                       |   |   |                                     |
|            |                               |                                                                                                                            |     | 7        | M1N N2E T76I K98R C540G S628R F825L                                              |   |   |                                     |
|            |                               |                                                                                                                            | 4   | 1        | M54L H161N M219R A354V A622T A658D T688M P862S                                   |   |   |                                     |
|            |                               |                                                                                                                            |     | 2        | V174A A247E I254L A354V L562I A622T T688M                                        |   |   |                                     |
|            |                               |                                                                                                                            |     | 3        | M219R R292C A354V S495F A622T T688M                                              |   |   |                                     |
|            |                               |                                                                                                                            |     | 4        | A622T T688M                                                                      |   |   |                                     |
|            |                               |                                                                                                                            |     | 5        | A622T T688M                                                                      |   |   |                                     |
|            |                               |                                                                                                                            |     | <b>6</b> | <b>K98R A622T T688M</b>                                                          |   |   |                                     |
|            |                               |                                                                                                                            | SP6 | No Pulse | TP6                                                                              | 1 | 1 | E222V E356D D388G A586V N748D I875L |
|            |                               |                                                                                                                            |     |          |                                                                                  |   | 2 | D13A E222A A615V T688M              |
|            |                               |                                                                                                                            |     |          |                                                                                  |   | 3 | M219R Y623C T688M                   |
| 4          | E222V                         |                                                                                                                            |     |          |                                                                                  |   |   |                                     |
| 5          | E356D N748D I875L             |                                                                                                                            |     |          |                                                                                  |   |   |                                     |
| <b>6</b>   | <b>D13A L170F E222A I875L</b> |                                                                                                                            |     |          |                                                                                  |   |   |                                     |
| 2          | 1                             | S43A S128R E222K                                                                                                           |     |          |                                                                                  |   |   |                                     |
|            | 2                             | D366N L526P E643K T688M N748D                                                                                              |     |          |                                                                                  |   |   |                                     |
|            | 3                             | S43A S128R E222K E309G G449S V470I                                                                                         |     |          |                                                                                  |   |   |                                     |
|            | 4                             | S128R                                                                                                                      |     |          |                                                                                  |   |   |                                     |
|            | <b>5</b>                      | <b>Q239R G803E</b>                                                                                                         |     |          |                                                                                  |   |   |                                     |
| 3          | 1                             | M219R                                                                                                                      |     |          |                                                                                  |   |   |                                     |
|            | 2                             | T127A M219R                                                                                                                |     |          |                                                                                  |   |   |                                     |
|            | 3                             | E222K                                                                                                                      |     |          |                                                                                  |   |   |                                     |
|            | <b>4</b>                      | <b>E222K H799P A827P</b>                                                                                                   |     |          |                                                                                  |   |   |                                     |
|            | 5                             | K8N K98R A144T K172Q S495A E498G T566I V574A P818A T831A Y846C D851V P862A L870K N871C R873S L876S S878L D879V F880L F882L |     |          |                                                                                  |   |   |                                     |
| 4          | 1                             | E222K A260S V574A                                                                                                          |     |          |                                                                                  |   |   |                                     |
|            | 2                             | M219K V574A E600G                                                                                                          |     |          |                                                                                  |   |   |                                     |
|            | 3                             | D13V M219R V574A                                                                                                           |     |          |                                                                                  |   |   |                                     |
|            | 4                             | V574A                                                                                                                      |     |          |                                                                                  |   |   |                                     |
|            | 5                             | V574A                                                                                                                      |     |          |                                                                                  |   |   |                                     |
|            | <b>6</b>                      | <b>R34C V574A</b>                                                                                                          |     |          |                                                                                  |   |   |                                     |
|            | 7                             | M219R A260V W682R                                                                                                          |     |          |                                                                                  |   |   |                                     |
| SP6        | Pre-Pulse                     | TP6                                                                                                                        | 1   | 1        | K98R D208A E403D K448R S684F N748D                                               |   |   |                                     |
|            |                               |                                                                                                                            | 1   | 2        | R96L K98R K172Q M219K I244V P371S A373T S641A A822E                              |   |   |                                     |

|    |                                          |                                                            |    |                                                                 |                                                                                    |   |   |                                          |
|----|------------------------------------------|------------------------------------------------------------|----|-----------------------------------------------------------------|------------------------------------------------------------------------------------|---|---|------------------------------------------|
|    |                                          |                                                            |    | 3                                                               | R96L K98R D130N K172Q M219K T282A S606A S641A A822E C839Y                          |   |   |                                          |
|    |                                          |                                                            |    | 4                                                               | R96L K98R H161Y V166I K172Q M219K T282A P371S S606A S641A N748S A822E              |   |   |                                          |
|    |                                          |                                                            |    | 5                                                               | R96L K98R H161Y V166I K172Q M219K T282A P371S S606A S641A N748S A822E              |   |   |                                          |
|    |                                          |                                                            |    | 6                                                               | R96L K98R H161Y V166I K172Q M219K T282A P371S S606A S641A N748S A822E              |   |   |                                          |
|    |                                          |                                                            |    | 7                                                               | <b>R96L K98R H161Y V166I K172Q M219K I244V T282A P371S S606A S641A N748S A822E</b> |   |   |                                          |
|    |                                          |                                                            | 2  | 1                                                               | K98R D208A E403D K448R S684F N748D                                                 |   |   |                                          |
|    |                                          |                                                            |    | 2                                                               | Y28C K98R D208A E403D S684F N748D                                                  |   |   |                                          |
|    |                                          |                                                            |    | 3                                                               | K98R K120R D208A E403D S684F N748D                                                 |   |   |                                          |
|    |                                          |                                                            |    | 4                                                               | K98R D208A E403D E504W Q505P S684F N748D                                           |   |   |                                          |
|    |                                          |                                                            |    | 5                                                               | K98R F162L K163R D208A E403D S684F N748D                                           |   |   |                                          |
|    |                                          |                                                            |    | 6                                                               | <b>K98R D208A E403D S684F N748D</b>                                                |   |   |                                          |
|    |                                          |                                                            |    | 7                                                               | E403D S684F N748D                                                                  |   |   |                                          |
|    |                                          |                                                            | 3  | 1                                                               | I154L M219R S641A N748S                                                            |   |   |                                          |
|    |                                          |                                                            |    | 2                                                               | M219R R391S E504W Q505P S641A N748S A843S                                          |   |   |                                          |
|    |                                          |                                                            |    | 3                                                               | M219R S641A N748S                                                                  |   |   |                                          |
|    |                                          |                                                            |    | 4                                                               | M219R N748S                                                                        |   |   |                                          |
|    |                                          |                                                            |    | 5                                                               | M219R N748S A881G                                                                  |   |   |                                          |
|    |                                          |                                                            |    | 6                                                               | <b>M219R N748S</b>                                                                 |   |   |                                          |
|    |                                          |                                                            |    | 7                                                               | N748S                                                                              |   |   |                                          |
|    |                                          |                                                            | 4  | 1                                                               | E222K A354V A622T G675R T688M                                                      |   |   |                                          |
|    |                                          |                                                            |    | 2                                                               | M219R A354V A622T T688M                                                            |   |   |                                          |
|    |                                          |                                                            |    | 3                                                               | M81V M219R P275L A354V A622T T688M                                                 |   |   |                                          |
|    |                                          |                                                            |    | 4                                                               | A354V A622T T688M                                                                  |   |   |                                          |
|    |                                          |                                                            |    | 5                                                               | A354V A622T T688M                                                                  |   |   |                                          |
|    |                                          |                                                            |    | 6                                                               | A234G A354V A622T T688M                                                            |   |   |                                          |
|    |                                          |                                                            |    | 7                                                               | <b>E222A A354V A622T T688M</b>                                                     |   |   |                                          |
|    |                                          |                                                            | T3 | 12h                                                             | Variant -3                                                                         | 1 | 1 | L39I M219R P277Q S539A G618S N748D K765Q |
|    |                                          |                                                            |    |                                                                 |                                                                                    |   | 2 | M219R A247T N748S                        |
| 3  | M219R A247T N437T N748S R829S            |                                                            |    |                                                                 |                                                                                    |   |   |                                          |
| 4  | M219R A247T N748S                        |                                                            |    |                                                                 |                                                                                    |   |   |                                          |
| 5  | M219R                                    |                                                            |    |                                                                 |                                                                                    |   |   |                                          |
| 6  | <b>A138T M219R A247T N748S</b>           |                                                            |    |                                                                 |                                                                                    |   |   |                                          |
| 7  | T23I M219R N370S A519T L532F A691T N748D |                                                            |    |                                                                 |                                                                                    |   |   |                                          |
| 2  | 1                                        | M219R N370S A519T L532F N748D                              |    |                                                                 |                                                                                    |   |   |                                          |
|    | 2                                        | M46V R155H M219R V227A N370S A380V A519T L532F T668I N748D |    |                                                                 |                                                                                    |   |   |                                          |
|    | 3                                        | <b>M219R N370S A519T L532F N748D</b>                       |    |                                                                 |                                                                                    |   |   |                                          |
|    | 4                                        | M219R N370S E504G L532F N748D                              |    |                                                                 |                                                                                    |   |   |                                          |
|    | 5                                        | H161P N370S A519T L532F N748D                              |    |                                                                 |                                                                                    |   |   |                                          |
|    | 6                                        | N370S A519T L532F N748D                                    |    |                                                                 |                                                                                    |   |   |                                          |
|    | 7                                        | N370S A519T L532F N748D                                    |    |                                                                 |                                                                                    |   |   |                                          |
| T3 | 12h                                      | Variant -5                                                 | 3  | 1                                                               | R96L K98R K172Q M219K M267I T282A A373S S606A S641A E768G A822E                    |   |   |                                          |
|    |                                          |                                                            |    | 2                                                               | R96L K98R K172Q M219K T282A S606A S641A A822E                                      |   |   |                                          |
|    |                                          |                                                            |    | 3                                                               | R96L K98R K172Q M219K T282A S606A S641A A822E                                      |   |   |                                          |
|    |                                          |                                                            |    | 4                                                               | R96L K98R K172Q M219K T282A S606A S641A A822E                                      |   |   |                                          |
|    |                                          |                                                            |    | 5                                                               | R96L K98R K172Q M219K T282A S606A S641A A822E                                      |   |   |                                          |
|    |                                          |                                                            |    | 6                                                               | R96L K98R K172Q M219K T282A S606A S641A A822E                                      |   |   |                                          |
|    |                                          |                                                            |    | 7                                                               | <b>R96L K98R K172Q M219K T282A S606A S641A A822E</b>                               |   |   |                                          |
|    |                                          | 4                                                          | 1  | R96L K98R K172Q M219K Q239K T282A A383V S606A S641A D653Y A822E |                                                                                    |   |   |                                          |
|    |                                          |                                                            | 2  | R96L K98R K172Q M219K T282A S606A S641A A822E                   |                                                                                    |   |   |                                          |
|    |                                          |                                                            | 3  | R96L K98R K172Q M219K T282A S606A S641A A822E                   |                                                                                    |   |   |                                          |
|    |                                          |                                                            | 4  | R96L K98R K172Q M219K T282A E504G S606A S641A A822E             |                                                                                    |   |   |                                          |
|    |                                          |                                                            | 5  | R96L K98R K172Q M219K T282A S606A S641A A822E                   |                                                                                    |   |   |                                          |
|    |                                          |                                                            | 6  | R96L K98R K172Q M219K T282A S606A S641A A822E                   |                                                                                    |   |   |                                          |
|    |                                          |                                                            | 7  | <b>R96L K98R K172Q M219K T282A S606A S641A A822E</b>            |                                                                                    |   |   |                                          |

|    |           |                           |   |                                            |                                                                   |   |                                |
|----|-----------|---------------------------|---|--------------------------------------------|-------------------------------------------------------------------|---|--------------------------------|
| T3 | No Pulse  | Variant -3                | 1 | 1                                          | H205R I244V M666I N748D D851G                                     |   |                                |
|    |           |                           |   | 2                                          | M219R R307L N748T                                                 |   |                                |
|    |           |                           |   | 3                                          | N2S L191I C216S I244V D366N M666I N748D                           |   |                                |
|    |           |                           |   | 4                                          | <b>A138T A188G M219R N748T</b>                                    |   |                                |
|    |           |                           | 2 | 1                                          | M219R M313T A622S V710I N748D S838Y L853S                         |   |                                |
|    |           |                           |   | 2                                          | M219R M313T A622S V710I N748D S838Y                               |   |                                |
|    |           |                           |   | 3                                          | M219R A622S V710I N748D S838Y                                     |   |                                |
|    |           |                           | 4 | M219R N588S                                |                                                                   |   |                                |
|    |           |                           | 5 | M219R M313T A622S V710I N748D S838Y        |                                                                   |   |                                |
|    |           |                           | 6 | M219R M313T Q505A A622S N748D S838Y        |                                                                   |   |                                |
|    |           |                           | 7 | <b>M219R M313T A622S V710I N748D S838Y</b> |                                                                   |   |                                |
| T3 | No Pulse  | Variant -5                | 3 | 1                                          | R57C M219R S495F V574A E643K N748S                                |   |                                |
|    |           |                           |   | 2                                          | A25T E35G R57C M219R V574A E643K N748S                            |   |                                |
|    |           |                           |   | 3                                          | R57C A68S M219R P476S V521A V574A E643K N748S A863T               |   |                                |
|    |           |                           |   | 4                                          | R57C V574A E643K N748S                                            |   |                                |
|    |           |                           |   | 5                                          | R57C M219R V574A E643K N748S                                      |   |                                |
|    |           |                           |   | 6                                          | <b>R57C M219R V574A E643K N748S</b>                               |   |                                |
|    |           |                           | 4 | 1                                          | E112G V134I T326A K378R M439I T440N A615T L621M L651M A708T E775K |   |                                |
|    |           |                           |   | 2                                          | E108G E112G V134I K378R M439I A615T L621M L651M A708T E775K F849L |   |                                |
|    |           |                           |   | 3                                          | V134I A247V W344R V594I L621M L651M E775K                         |   |                                |
|    |           |                           |   | 4                                          | V134I L621M L651M E775K                                           |   |                                |
|    |           |                           |   | 5                                          | V134I L621M L651M E775K                                           |   |                                |
|    |           |                           |   |                                            |                                                                   | 6 | <b>V134I L621M L651M E775K</b> |
|    |           |                           | 4 | 7                                          | V134I L621M L651M E775K                                           |   |                                |
| T3 | Pre-Pulse | Variant -3                | 1 | 2                                          | I109V S241A E249G T598A N748D                                     |   |                                |
|    |           |                           |   | 3                                          | R57H M219R I367T A658T N748T                                      |   |                                |
|    |           |                           |   | 4                                          | N748D                                                             |   |                                |
|    |           |                           |   | 5                                          | M219R                                                             |   |                                |
|    |           |                           |   | 6                                          | <b>I109V A253V N748D H799R</b>                                    |   |                                |
|    |           |                           |   | 1                                          | E218A A513S S527N N748D                                           |   |                                |
|    |           |                           | 2 | 2                                          | E218A Q232R A255S A491V R720H N748D                               |   |                                |
|    |           |                           |   | 3                                          | I4V F21S G62S E218A Y250C A255S I355L N748D                       |   |                                |
|    |           |                           |   | 4                                          | N748D                                                             |   |                                |
|    |           |                           |   | 5                                          | E218A A255S N748D                                                 |   |                                |
|    |           |                           |   | 6                                          | <b>E218A N748D</b>                                                |   |                                |
| 2  | 7         | T3M N86Y K98E G152C F182I |   |                                            |                                                                   |   |                                |
| T3 | Pre-Pulse | Variant -5                | 3 | 1                                          | V134I A247V A295S E483K V594I N601T L621M L651M E775K             |   |                                |
|    |           |                           |   | 2                                          | V134I M219R V236I A247V T299N L621M L651M M666V N748D E775K       |   |                                |
|    |           |                           |   | 3                                          | V134I A247V A295S E483K V594I N601T L621M L651M E775K             |   |                                |
|    |           |                           |   | 4                                          | V134I A247V V594I N601T L621M L651M E775K                         |   |                                |
|    |           |                           |   | 5                                          | V134I A247V V594I N601T L621M L651M E775K                         |   |                                |
|    |           |                           |   | 6                                          | V134I A247V N601T L621M L651M E775K                               |   |                                |
|    |           |                           |   | 7                                          | <b>V134I A247V V594I N601T L621M L651M E775K</b>                  |   |                                |
|    |           |                           | 4 | 1                                          | A138T M219R N419S A558E N748T                                     |   |                                |
|    |           |                           |   | 2                                          | A18S M219R H346N H523Y I543V A558E N748T                          |   |                                |
|    |           |                           |   | 3                                          | M219R H300L K450E N748S                                           |   |                                |
|    |           |                           |   | 4                                          | M219R V227F A558E N748T                                           |   |                                |
|    |           |                           |   | 5                                          | M219R A558E N748T                                                 |   |                                |
|    |           |                           |   | 6                                          | <b>M219R A234G Q505E A558E N748T</b>                              |   |                                |
|    |           |                           | 7 | E168A M219R I330L N748S                    |                                                                   |   |                                |

**Supplementary Table 4 | Extended methods information.**

Contains part numbers and all plasmids used in experiments throughout the manuscript.

| Item                                                                                                                                                                                                                                                  | Company                     | Catalog no.                     | Notes                                                                             |
|-------------------------------------------------------------------------------------------------------------------------------------------------------------------------------------------------------------------------------------------------------|-----------------------------|---------------------------------|-----------------------------------------------------------------------------------|
| <b>Cloning</b>                                                                                                                                                                                                                                        |                             |                                 |                                                                                   |
| Mach1 Competent E coli                                                                                                                                                                                                                                | Thermo Fisher Scientific    | C862003                         |                                                                                   |
| Turbo Competent E coli                                                                                                                                                                                                                                | New England BioLabs         | C2984H                          |                                                                                   |
| NEB 5-alpha Competent E coli                                                                                                                                                                                                                          | New England BioLabs         | C2988J                          |                                                                                   |
| NEB 10-beta Competent E coli                                                                                                                                                                                                                          | New England BioLabs         | C3019H                          |                                                                                   |
| Illustra TempliPhi 100 Amplification Kit                                                                                                                                                                                                              | GE Healthcare Life Sciences | 89131-612                       |                                                                                   |
| Phusion U GreenHotStart DNA Poly (Box)                                                                                                                                                                                                                | Thermofisher                | F556L                           | Standard cloning polymerase                                                       |
| Phusion Hotstart Flex                                                                                                                                                                                                                                 | New England BioLabs         | M0535S                          | For Blunt end ligation                                                            |
| dNTP Mix, natural (10mM), 4mL                                                                                                                                                                                                                         | New England BioLabs         | N0447L                          |                                                                                   |
| ET SSB                                                                                                                                                                                                                                                | VWR                         | 101417-992                      | PCR additive                                                                      |
| Dpnl-5000 units/pack                                                                                                                                                                                                                                  | New England BioLabs         | New England BioLabs             | For USER cloning                                                                  |
| Enzyme, USER, 250Units (250ul/tu)                                                                                                                                                                                                                     | New England BioLabs         | M5505L                          | For USER cloning                                                                  |
| PCR purification                                                                                                                                                                                                                                      | Qiagen                      | 28106                           | For PCR purification                                                              |
| Blunt/TA Ligase Master Mix                                                                                                                                                                                                                            | New England BioLabs         | M0367L                          | For Blunt end ligation                                                            |
| <b>Filters for M13 bacteriophage</b>                                                                                                                                                                                                                  |                             |                                 |                                                                                   |
| mdi 0.22µm filter columns for phage purification                                                                                                                                                                                                      | Thomas Scientific           | 1166U41                         | For filtering up to 500uL of phage supernatant                                    |
| 96-well 0.22µm filter plate for phage purification                                                                                                                                                                                                    | Corning                     | 3505                            | For filtering up to 150uL of phage supernatant in each well of a 96-well plate    |
| Steriflip 50mL spin filter unit for for phage purification                                                                                                                                                                                            | Sigma Aldrich               | Z380660                         | For filtering up to 50mL of phage supernatant                                     |
| <b>Plaque assays</b>                                                                                                                                                                                                                                  |                             |                                 |                                                                                   |
| Bluo-Gal, 10g                                                                                                                                                                                                                                         | Goldbio                     | CAS #97753-82-7. CAT #B-673-10. | Improves plaque contrast when plaquing in S2060-based strains (contains PSP-lacZ) |
| DMF (NN dimethyl formamide)                                                                                                                                                                                                                           | Sigma Aldrich               | 270547-100ML                    | Use to dissolve Bluo-Gal                                                          |
| 1mL Hamilton tips. Clear, Sterile, Filter                                                                                                                                                                                                             | Hamilton                    | Part # / Ref: 235821            | Robotic plaque assays, PRANCE                                                     |
| 300uL Hamilton tips. Clear, Sterile, Filter                                                                                                                                                                                                           | Hamilton                    | Part # / Ref: 235832            | Robotic plaque assays, PRANCE                                                     |
| 24-well plates, in sleeves                                                                                                                                                                                                                            | VWR                         | 82050-894                       | Robotic plaque assays                                                             |
| X-plates                                                                                                                                                                                                                                              | VWR                         | 25384308                        | Manual plaque assays                                                              |
| <b>PACE supplies</b>                                                                                                                                                                                                                                  |                             |                                 |                                                                                   |
| Plate reader plate, 96w Black clear Costar                                                                                                                                                                                                            | Fisher Scientific           | 07-200-567                      |                                                                                   |
| 1 mL syringe (green), pack of 100                                                                                                                                                                                                                     | VWR                         | 53548-001                       |                                                                                   |
| 50(60)mL syringe, pack of 30                                                                                                                                                                                                                          | VWR                         | 80076-428                       |                                                                                   |
| <i>See additional PACE materials:<br/><a href="https://docs.google.com/spreadsheets/d/1hxYO9KX_xSYT4xRf5txSikVCFeMUEct3BztZKAgybTE/edit#gid=0">https://docs.google.com/spreadsheets/d/1hxYO9KX_xSYT4xRf5txSikVCFeMUEct3BztZKAgybTE/edit#gid=0</a></i> |                             |                                 |                                                                                   |
| <b>Chemicals &amp; Media</b>                                                                                                                                                                                                                          |                             |                                 |                                                                                   |
| 2XYT media powder                                                                                                                                                                                                                                     | United States Biologicals   | T9200                           |                                                                                   |
| Agar, Bacteriological; 10 KG                                                                                                                                                                                                                          | United States Biologicals   | A0930                           |                                                                                   |
| L-Arabinose; 5 kg                                                                                                                                                                                                                                     | GoldBio                     | A-300-5                         | MP inducer                                                                        |
| IPTG                                                                                                                                                                                                                                                  | GoldBio                     | I2481C5                         | Inducer                                                                           |
| DRM autoclaved component: Harvard Custom Media A                                                                                                                                                                                                      | United States Biologicals   | #CS050H-001                     | Autoclaved component of DRM                                                       |

| DRM non-autoclaved component: Harvard Custom Media C                                                                 | United States Biologicals      | #CS050H-003          | Filtered component of DRM                                                                     |
|----------------------------------------------------------------------------------------------------------------------|--------------------------------|----------------------|-----------------------------------------------------------------------------------------------|
| <b>Assorted laboratory supplies</b>                                                                                  |                                |                      |                                                                                               |
| 96-well PCR plates (half skirt), Greiner Bio, pack of 10                                                             | VWR                            | 652290               | For PCR, 96-well phage filtration                                                             |
| 2mL screw cap tubes (VWR), case 5000                                                                                 | VWR                            | 10025-756            | Recommended for phage storage                                                                 |
| VWR® Aluminum Foils for 96-Well Plates                                                                               | VWR                            | 60941-126            |                                                                                               |
| Porous sealign film: VWR® Rayon Films for Biological Cultures                                                        | VWR                            | 60941-084            |                                                                                               |
| 2mL deep 96-well plate                                                                                               | Thomas scientific              | 1149J23              |                                                                                               |
| "Fishtank pumps": INTLLAB 12V DC DIY Peristaltic Liquid Pump Dosing Pump for Aquarium Lab Analytical 3mm ID x 5mm OD | Amazon                         | <a href="#">link</a> |                                                                                               |
| <b>Liquid Handling Robot</b>                                                                                         |                                |                      |                                                                                               |
| Hamilton STARlet                                                                                                     | Hamilton Company               | 173020               |                                                                                               |
| 1000µl Pipetting Channels, 8 channels                                                                                | Hamilton Company               | 173081               |                                                                                               |
| CO-RE 96 channel Multi Probe Head                                                                                    | Hamilton Company               | 199090               |                                                                                               |
| iSWAP Plate Handler                                                                                                  | Hamilton Company               | 190220               |                                                                                               |
| HEPA Flow Hood, UV                                                                                                   | Hamilton Company               | 55502-01             |                                                                                               |
| <b>Peripheral Hardware</b>                                                                                           |                                |                      |                                                                                               |
| CLARIOstar Multi-Mode Microplate Reader                                                                              | BMG LABTECH                    | 0430-101             |                                                                                               |
| USB Microplate Orbital Shaker                                                                                        | Big Bear Automation            | HT-91108-2           |                                                                                               |
| <b>3D printed components</b>                                                                                         |                                |                      |                                                                                               |
| 8-channel bacterial reservoir                                                                                        | <a href="#">See .stl files</a> |                      | Printed on a Formlabs Form 3 resin printer                                                    |
| 96-channel bacterial reservoir                                                                                       |                                |                      | Printed on a Formlabs Form 3 resin printer                                                    |
| <b>3D printed components</b>                                                                                         |                                |                      |                                                                                               |
| 8-channel bacterial reservoir                                                                                        | <a href="#">See .stl files</a> |                      | Printed on a Formlabs Form 3 resin printer                                                    |
| 96-channel bacterial reservoir                                                                                       |                                |                      | Printed on a Formlabs Form 3 resin printer                                                    |
| <b>Plasmid maps</b>                                                                                                  |                                |                      |                                                                                               |
| <a href="#">Download all .gb plasmid maps</a>                                                                        |                                |                      |                                                                                               |
| Name                                                                                                                 | Type                           | Resistance           | Genotype                                                                                      |
| S2060                                                                                                                | Bacterial strain               | -                    | See addgene:<br><a href="https://www.addgene.org/105064/">https://www.addgene.org/105064/</a> |
| pJC173b                                                                                                              | Plasmid                        | Carb                 | T7 promoter driving pIII and luxAB                                                            |
| pJC174b                                                                                                              | Plasmid                        | Carb                 | T3 promoter driving pIII and luxAB                                                            |
| pJC175e                                                                                                              | Plasmid                        | Carb                 | PSP-pIII promoter driving pIII and luxAB                                                      |
| pEC201                                                                                                               | Plasmid                        | Carb                 | T3/TP6 promoter driving pIII and luxAB                                                        |
| pEC202                                                                                                               | Plasmid                        | Carb                 | T7/SP6 promoter driving pIII and luxAB                                                        |
| pEC203                                                                                                               | Plasmid                        | Carb                 | SP6 promoter driving pIII and luxAB                                                           |
| pEC204                                                                                                               | Plasmid                        | Carb                 | SP6/TP6 promoter driving pIII and luxAB                                                       |
| pEC205                                                                                                               | Plasmid                        | Carb                 | TP6 promoter driving pIII and luxAB                                                           |
| pEC206                                                                                                               | Plasmid                        | Carb                 | -3 variant promoter driving pIII and luxAB                                                    |
| pEC207                                                                                                               | Plasmid                        | Carb                 | -5 variant promoter driving pIII and luxAB                                                    |
| pED20x5                                                                                                              | Plasmid                        | Spec                 | Phage Shock Promoter driving T7 RNAP-12-203-TAGA                                              |
| pED15x1                                                                                                              | Plasmid                        | Kan                  | proD driving pIII-29-TAGA and luxAB-357-TAGA                                                  |
| pED15x2                                                                                                              | Plasmid                        | Kan                  | proD driving pIII-29-34-TAGA and luxAB-357-TAGA                                               |
| pED15x7                                                                                                              | Plasmid                        | Kan                  | proD driving pIII-29-AGGG and luxAB-357-AGGG                                                  |
| ES rope                                                                                                              | Plasmid                        | Spec                 | No payload; simply a extra plasmid with SpecR                                                 |
| pEC182a                                                                                                              | Plasmid                        | Spec                 | Phage Shock Promoter driving pIII-29-TAG                                                      |
| ECSP1x11                                                                                                             | Selection Phage                | -                    | M13 ΔpIII phage expressing ChPyIRS-VTHA                                                       |
| ECSP1x13                                                                                                             | Selection Phage                | -                    | M13 ΔpIII phage expressing ChPyIRS-IP                                                         |
| WT T7 RNAP selection phage                                                                                           | Selection Phage                | Kan                  | M13 ΔpIII phage expressing T7 RNAP                                                            |



|            |                 |   |                                                                           |
|------------|-----------------|---|---------------------------------------------------------------------------|
| ESP1xA-1   | Selection Phage | - | Phage expressing A-qtRNA homologue continging a !TAGA anticodon           |
| ESP1xC-1   | Selection Phage | - | Phage expressing C-qtRNA homologue continging a !TAGA anticodon           |
| ESP1xD-1   | Selection Phage | - | Phage expressing D-qtRNA homologue continging a !TAGA anticodon           |
| ESP1xE-1   | Selection Phage | - | Phage expressing E-qtRNA homologue continging a !TAGA anticodon           |
| ESP1xF-1   | Selection Phage | - | Phage expressing F-qtRNA homologue continging a !TAGA anticodon           |
| ESP1xG-1   | Selection Phage | - | Phage expressing G-qtRNA homologue continging a !TAGA anticodon           |
| ESP1xH-1   | Selection Phage | - | Phage expressing H-qtRNA homologue continging a !TAGA anticodon           |
| ESP1xI-1   | Selection Phage | - | Phage expressing I-qtRNA homologue continging a !TAGA anticodon           |
| ESP1xK-1   | Selection Phage | - | Phage expressing K-qtRNA homologue continging a !TAGA anticodon           |
| ESP1xL-1   | Selection Phage | - | Phage expressing L-qtRNA homologue continging a !TAGA anticodon           |
| ESP1xM-1   | Selection Phage | - | Phage expressing M-qtRNA homologue continging a !TAGA anticodon           |
| ESP1xN-1   | Selection Phage | - | Phage expressing N-qtRNA homologue continging a !TAGA anticodon           |
| ESP1xP-1   | Selection Phage | - | Phage expressing P-qtRNA homologue continging a !TAGA anticodon           |
| ESP1xQ-1   | Selection Phage | - | Phage expressing Q-qtRNA homologue continging a !TAGA anticodon           |
| ESP1xR-1   | Selection Phage | - | Phage expressing R-qtRNA homologue continging a !TAGA anticodon           |
| ESP1xS-1   | Selection Phage | - | Phage expressing S-qtRNA homologue continging a !TAGA anticodon           |
| ESP1xT-1   | Selection Phage | - | Phage expressing T-qtRNA homologue continging a !TAGA anticodon           |
| ESP1xV-1   | Selection Phage | - | Phage expressing V-qtRNA homologue continging a !TAGA anticodon           |
| ESP1xW-1   | Selection Phage | - | Phage expressing W-qtRNA homologue continging a !TAGA anticodon           |
| ESP1xY-1   | Selection Phage | - | Phage expressing Y-qtRNA homologue continging a !TAGA anticodon           |
| ESP1xA-lib | Selection Phage | - | Phage expressing A-qtRNA homologue continging a randomized NNNN anticodon |
| ESP1xC-lib | Selection Phage | - | Phage expressing C-qtRNA homologue continging a randomized NNNN anticodon |
| ESP1xD-lib | Selection Phage | - | Phage expressing D-qtRNA homologue continging a randomized NNNN anticodon |
| ESP1xE-lib | Selection Phage | - | Phage expressing E-qtRNA homologue continging a randomized NNNN anticodon |
| ESP1xF-lib | Selection Phage | - | Phage expressing F-qtRNA homologue continging a randomized NNNN anticodon |
| ESP1xG-lib | Selection Phage | - | Phage expressing G-qtRNA homologue continging a randomized NNNN anticodon |
| ESP1xH-lib | Selection Phage | - | Phage expressing H-qtRNA homologue continging a randomized NNNN anticodon |
| ESP1xI-lib | Selection Phage | - | Phage expressing I-qtRNA homologue continging a randomized NNNN anticodon |
| ESP1xK-lib | Selection Phage | - | Phage expressing K-qtRNA homologue continging a randomized NNNN anticodon |
| ESP1xL-lib | Selection Phage | - | Phage expressing L-qtRNA homologue continging a randomized NNNN anticodon |

|            |                 |   |                                                                           |
|------------|-----------------|---|---------------------------------------------------------------------------|
| ESP1xM-lib | Selection Phage | - | Phage expressing M-qtRNA homologue continging a randomized NNNN anticodon |
| ESP1xN-lib | Selection Phage | - | Phage expressing N-qtRNA homologue continging a randomized NNNN anticodon |
| ESP1xP-lib | Selection Phage | - | Phage expressing P-qtRNA homologue continging a randomized NNNN anticodon |
| ESP1xQ-lib | Selection Phage | - | Phage expressing Q-qtRNA homologue continging a randomized NNNN anticodon |
| ESP1xR-lib | Selection Phage | - | Phage expressing R-qtRNA homologue continging a randomized NNNN anticodon |
| ESP1xS-lib | Selection Phage | - | Phage expressing S-qtRNA homologue continging a randomized NNNN anticodon |
| ESP1xT-lib | Selection Phage | - | Phage expressing T-qtRNA homologue continging a randomized NNNN anticodon |
| ESP1xV-lib | Selection Phage | - | Phage expressing V-qtRNA homologue continging a randomized NNNN anticodon |
| ESP1xW-lib | Selection Phage | - | Phage expressing W-qtRNA homologue continging a randomized NNNN anticodon |
| ESP1xY-lib | Selection Phage | - | Phage expressing Y-qtRNA homologue continging a randomized NNNN anticodon |
| ESP1xA-1   | Selection Phage | - | Phage expressing A-qtRNA homologue continging a !TAGA anticodon           |
